# Supplementary material for: Influence of Climate Warming on Arctic Mammals? New Insights from Ancient DNA Studies of the Collared Lemming Dicrostonyx torquatus
Source: PubMed Central journal article supplement (PMC2877706; doi:10.1371/journal.pone.0010447), 2010-05-27
Supplement: pone.0010447.s007.pdf [file pone.0010447.s007.pdf]

| <b>Locality</b> | <b>Layers</b> | <b>Age/Radiocarbon dates</b> | <b>Calibrated dates (Fairbanks0107)</b> |
|-----------------|---------------|------------------------------|-----------------------------------------|
| Pymva-Shor      | surface       | modern                       | -                                       |
| Pymva-Shor      | L4            | 10,000 $\pm$ 250 (GIN-9004)  | 11,538 $\pm$ 423                        |
| Pymva-Shor      | L6 up         | 13,090 $\pm$ 60 (CAMS-38221) | 15,246. $\pm$ 122                       |
| Pymva-Shor      | L6 low        | 21,910 $\pm$ 250 (TUa-11501) | 25,244 $\pm$ 359                        |
| Yangana-Pe-4    | L2            | up to 1,000                  | -                                       |
