# Supplementary material for: Influence of Climate Warming on Arctic Mammals? New Insights from Ancient DNA Studies of the Collared Lemming Dicrostonyx torquatus
Source: PubMed Central journal article supplement (PMC2877706; doi:10.1371/journal.pone.0010447), 2010-05-27
Supplement: pone.0010447.s008.pdf [file pone.0010447.s008.pdf]

|          | combined | Modern | 11,500 cal. yrs BP | 15,200 cal. yrs BP | 25,200 cal. yrs BP | 1000 BP |
|----------|----------|--------|--------------------|--------------------|--------------------|---------|
| C1H1     | 33       | 6      | 13                 | 1                  | 3                  | 10      |
| C1H2     | 1        | 1      |                    |                    |                    |         |
| C1H4     | 1        |        | 1                  |                    |                    |         |
| C2H1     | 1        | 1      |                    |                    |                    |         |
| C3H1     | 2        | 2      |                    |                    |                    |         |
| C4H1     | 2        |        |                    |                    |                    | 2       |
| C4H3     | 1        |        |                    |                    |                    | 1       |
| C5H1     | 10       |        | 2                  | 7                  | 1                  |         |
| C6H1     | 1        |        | 1                  |                    |                    |         |
| C7H1     | 1        |        | 1                  |                    |                    |         |
| C8H1     | 1        |        | 1                  |                    |                    |         |
| C9H1     | 1        |        | 1                  |                    |                    |         |
| C10H5    | 1        |        |                    | 1                  |                    |         |
| C11H6    | 3        |        |                    | 2                  | 1                  |         |
| C11H9    | 1        |        |                    |                    | 1                  |         |
| C12H7    | 3        |        |                    | 1                  | 2                  |         |
| C12H12   | 1        |        |                    |                    | 1                  |         |
| C13H1    | 9        |        |                    | 7                  | 2                  |         |
| C13H5    | 1        |        |                    | 1                  |                    |         |
| C14H8    | 1        |        |                    |                    | 1                  |         |
| C14H11   | 1        |        |                    |                    | 1                  |         |
| C15H10   | 1        |        |                    |                    | 1                  |         |
| $\Sigma$ | 77       | 10     | 20                 | 20                 | 14                 | 13      |
